# Supplementary material for: Three novel Bi(iii) complexes with in situ generated anilate ligands: unusual oxidation of cyclohexanedione to dihydroxy benzoquinone
Source: Royal Society of Chemistry journal article supplement (doi:10.1039/c1dt11258a), 2011-11-30
Supplement: c1dt11258a.pdf [file c1dt11258a.pdf]

# Three novel Bi(III) complexes with in situ generated anilate ligands: Unusual oxidation of cyclohexanedione to dihydroxy benzoquinone

Hui Gao, Xian-Ming Zhang\*

*School of Chemistry & Material Science, Shanxi Normal University, Linfen, Shanxi 041004, China. E-mail: [zhangxm@dns.sxnu.edu.cn](mailto:zhangxm@dns.sxnu.edu.cn)*

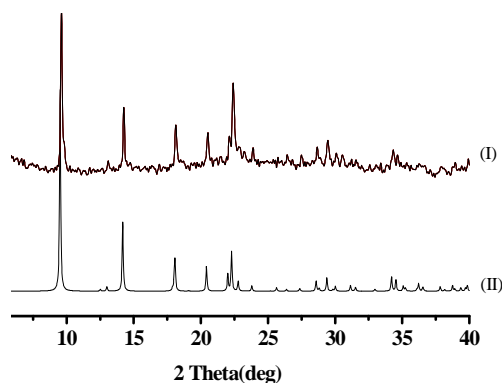

**Fig. S1.** Simulated (I) and experimental (II) XRPD patterns for **1**.

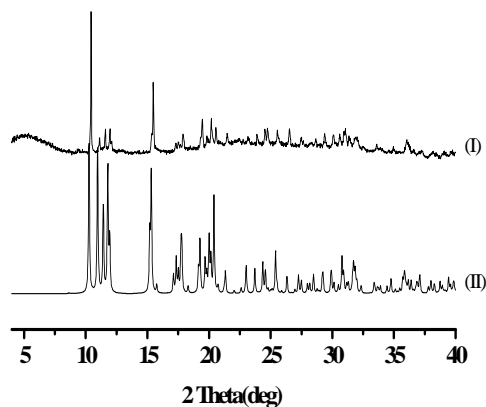

**Fig. S2.** Simulated (I) and experimental (II) XRPD patterns for **2**.

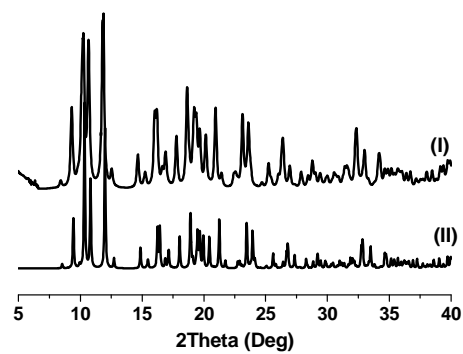

**Fig. S3.** Simulated (I) and experimental (II) XRPD patterns for **3**.

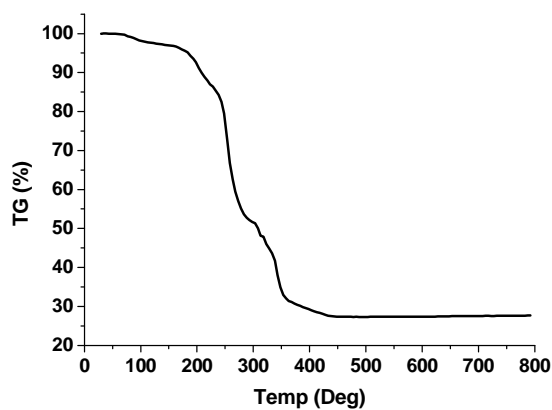

**Fig. S4.** The TG curve of **1** in air.

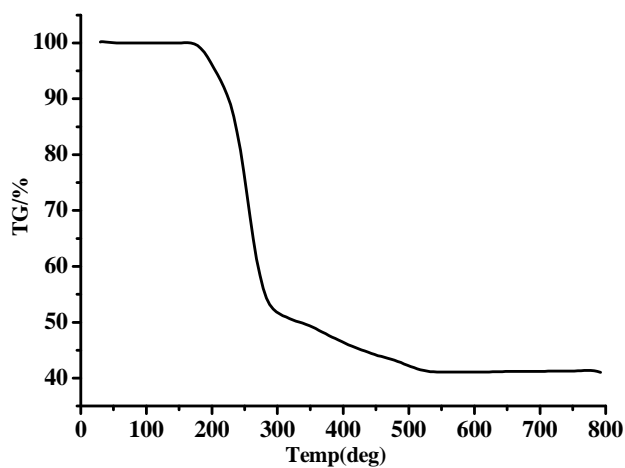

**Fig. S5.** The TG curve of **2** in air.

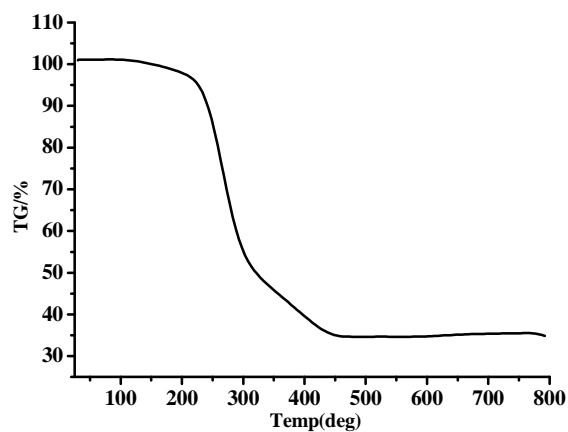

**Fig. S6.** The TG curve of **3** in air.

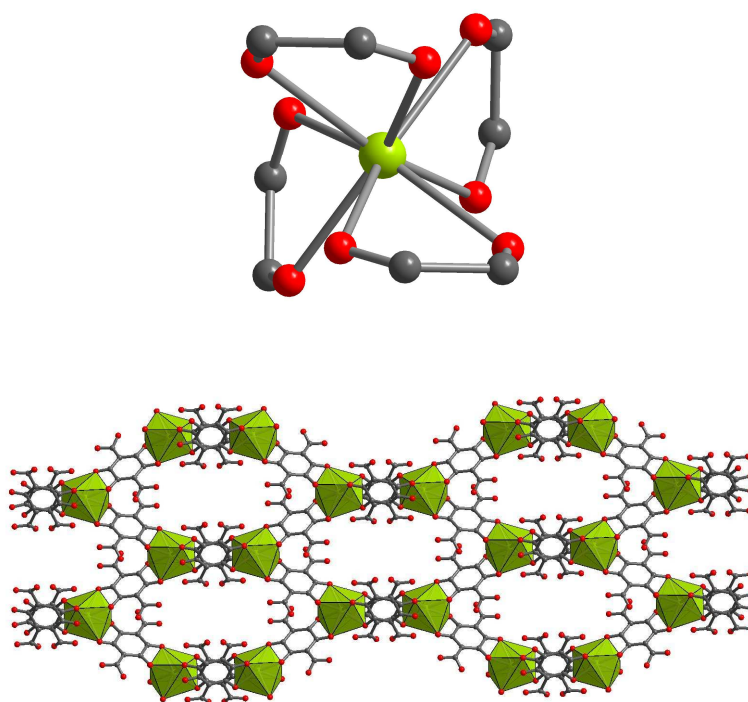

**Figure S7** Coordination environment of Bi emphasizing four fold inversion symmetry (top) and View of 3-D structure along *a*-axis direction (bottom) in **1**.

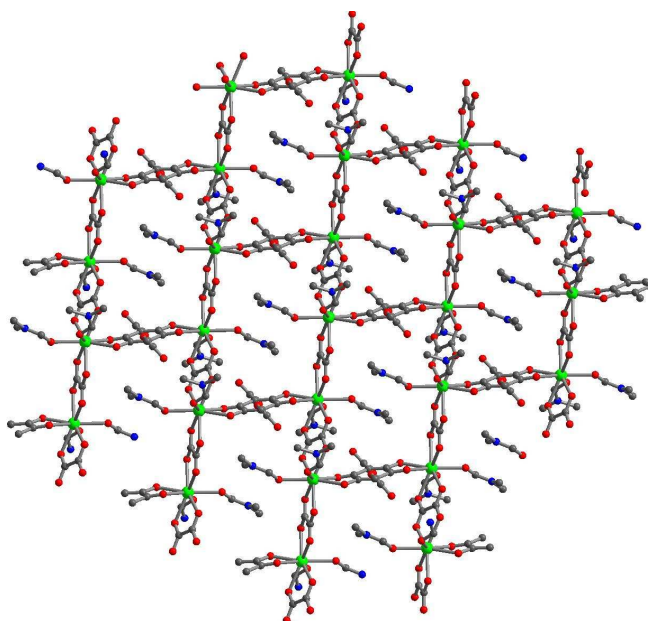

**Figure S8** View of layered brick-wall structure of **2**.

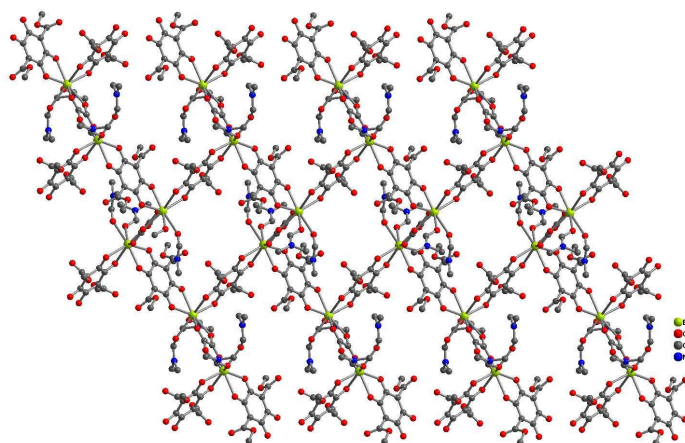

**Figure S9** View of layered herringbone structure of **3**.
